# Supplementary material for: Synthesis and characterisation of an N-heterocyclic carbene with spatially-defined steric impact
Source: Royal Society of Chemistry journal article supplement (doi:10.1039/c6dt02100j), 2016-01-01

Supporting Information for:

# Synthesis and characterisation of an N-heterocyclic carbene with spatially-defined steric impact

**Paul Shaw, Alan R. Kennedy, and David J. Nelson\***

WestCHEM Department of Pure and Applied Chemistry, University of Strathclyde, 295  
Cathedral Street, Glasgow, G1 1XL, UK.

david.nelson@strath.ac.uk

## Contents

|                        |     |
|------------------------|-----|
| NMR Spectra            | S2  |
| Mass Spectrometry      | S11 |
| GC-FID Calibration     | S12 |
| X-Ray Diffraction Data | S13 |

## Additional Data

Raw Data: <http://dx.doi.org/10.15129/ac8aeef2-8109-4c20-bb0d-d8d808e3ceda>  
(NMR FIDs)

CCDC Data: 1481901 (4), 1481902 (5), 1481903 (6), 1481904 (7),  
(XRD data) [http://www.ccdc.cam.ac.uk/data\\_request/cif](http://www.ccdc.cam.ac.uk/data_request/cif)

## NMR Spectra

Reference numbers refer to files available in the associated raw data deposit.

2-(Diphenylmethyl)-4,6-dimethylaniline (2)

(D238611)

$^1\text{H}$  NMR ( $\text{CDCl}_3$ )

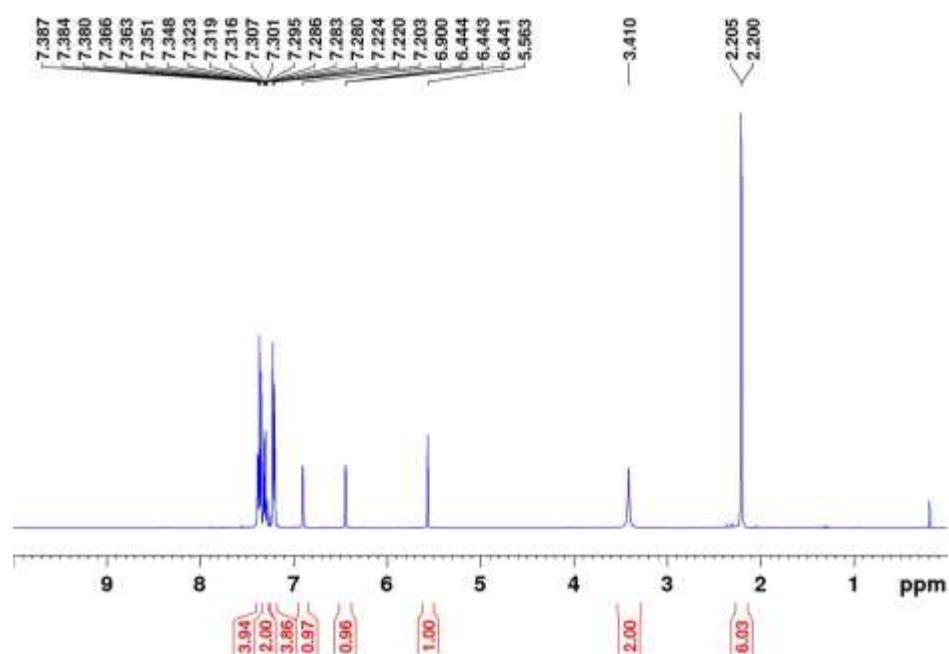

$^{13}\text{C}\{^1\text{H}\}$  NMR ( $\text{CDCl}_3$ )

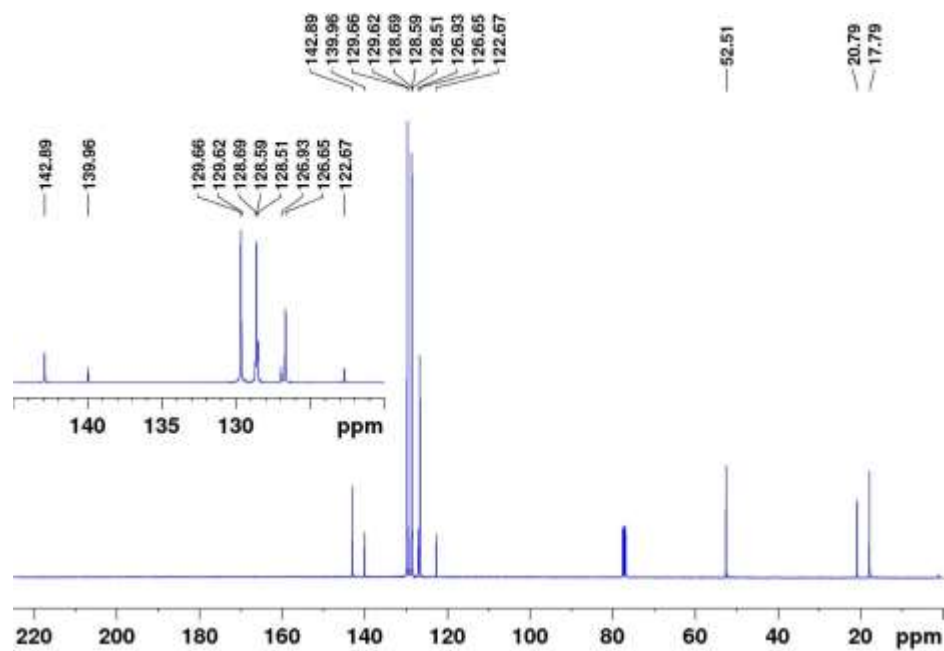

N,N'-bis(2-diphenylmethyl-4,6-dimethylphenyl)-ethane-1,2-diimine (3)

(D243392)

$^1\text{H}$  NMR ( $\text{CDCl}_3$ )

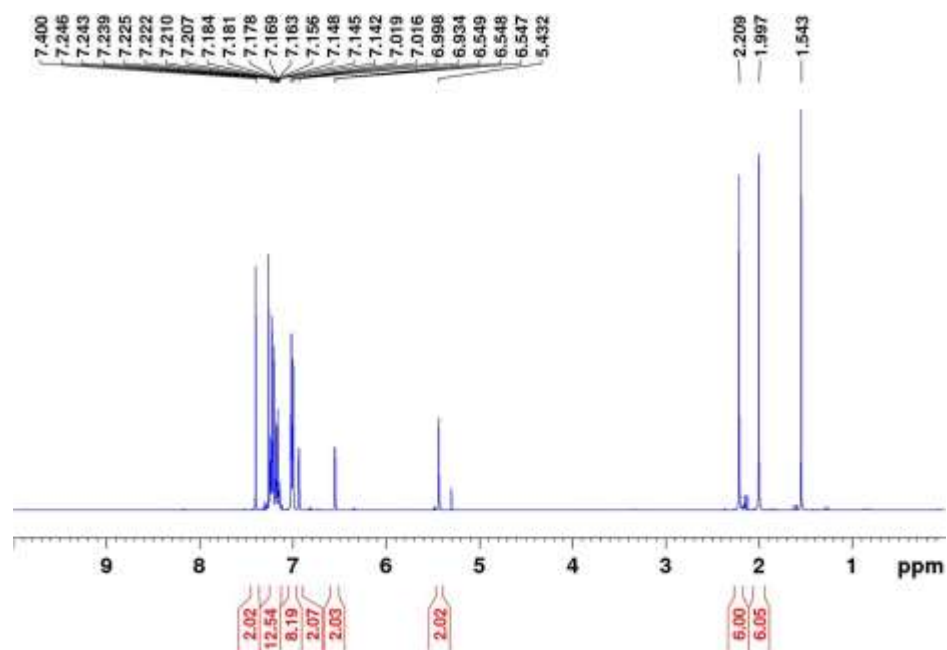

$^{13}\text{C}\{^1\text{H}\}$  NMR ( $\text{CDCl}_3$ )

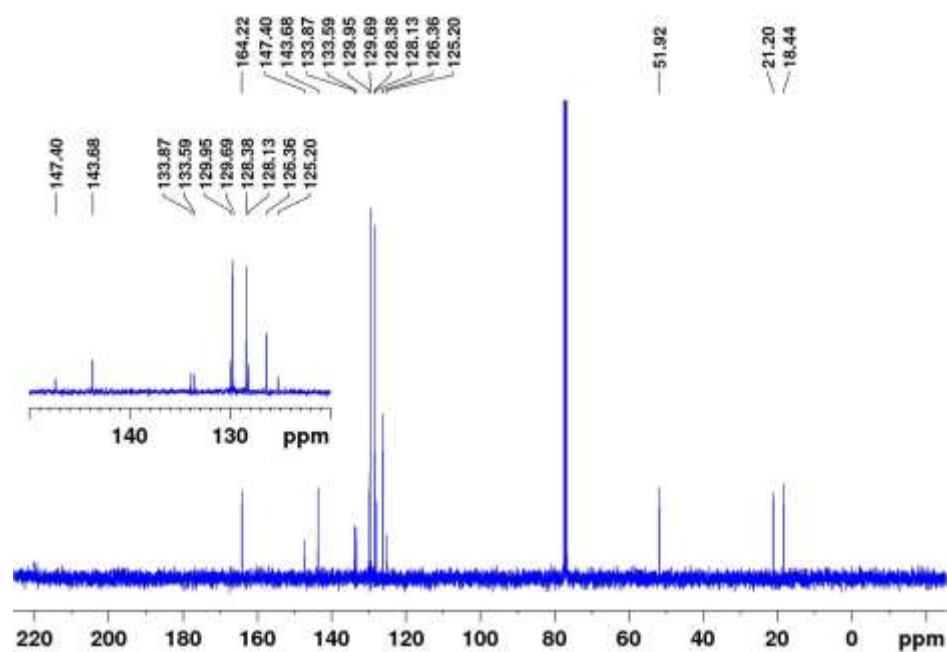

1,3-bis(2-diphenylmethyl-4,6-dimethylphenyl)-imidazolium chloride (1)

(D253527/32)

$^1\text{H}$  NMR ( $\text{CDCl}_3$ )

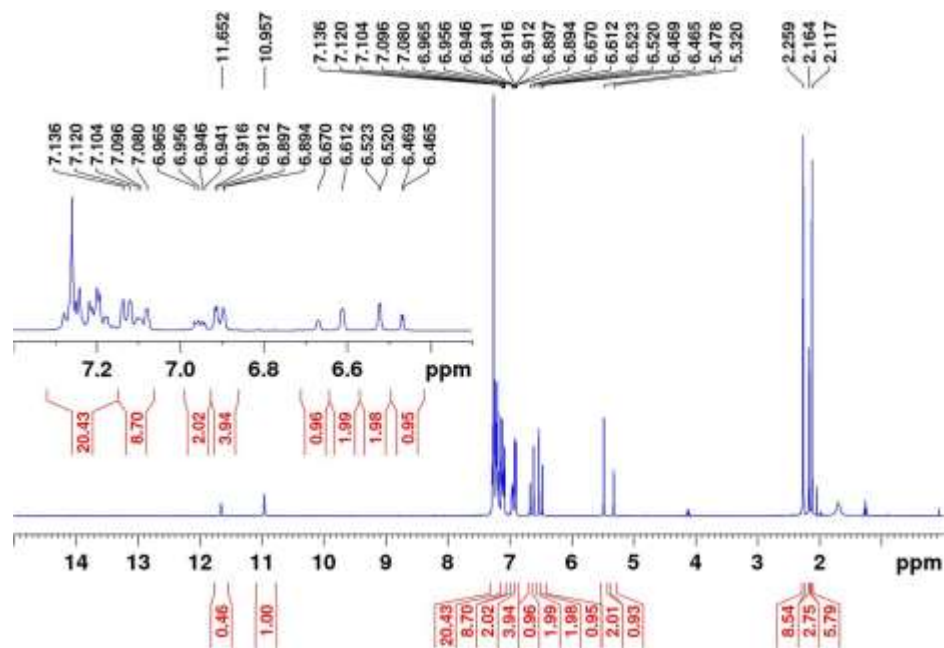

$^{13}\text{C}\{^1\text{H}\}$  NMR ( $\text{CDCl}_3$ )

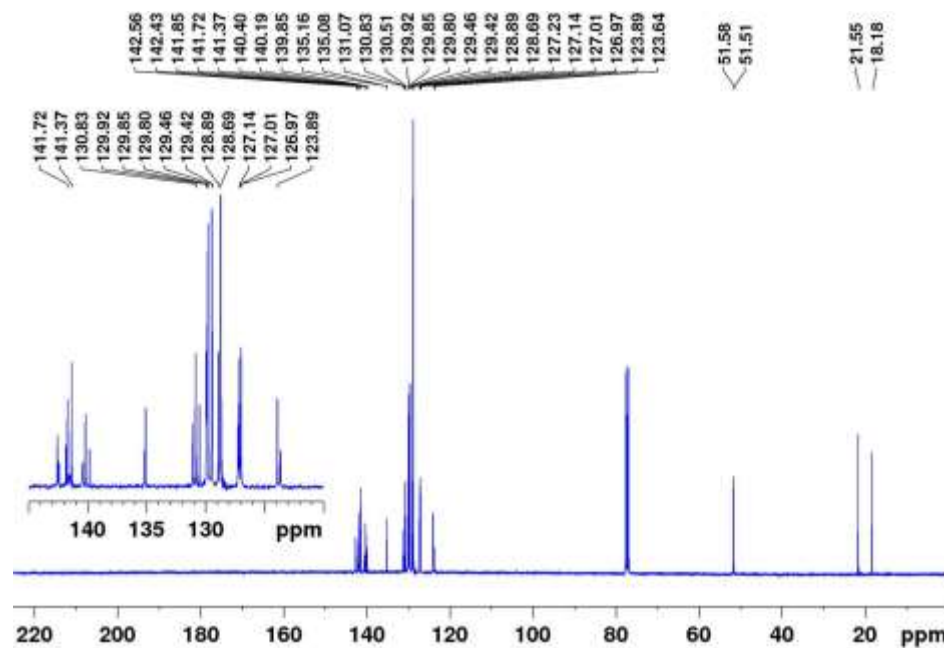

(1,3-bis(2-diphenylmethyl-4,6-dimethylphenyl)-imidazol-2-yl)copper (I) chloride (4) (D249119)

$^1\text{H}$  NMR ( $\text{CDCl}_3$ )

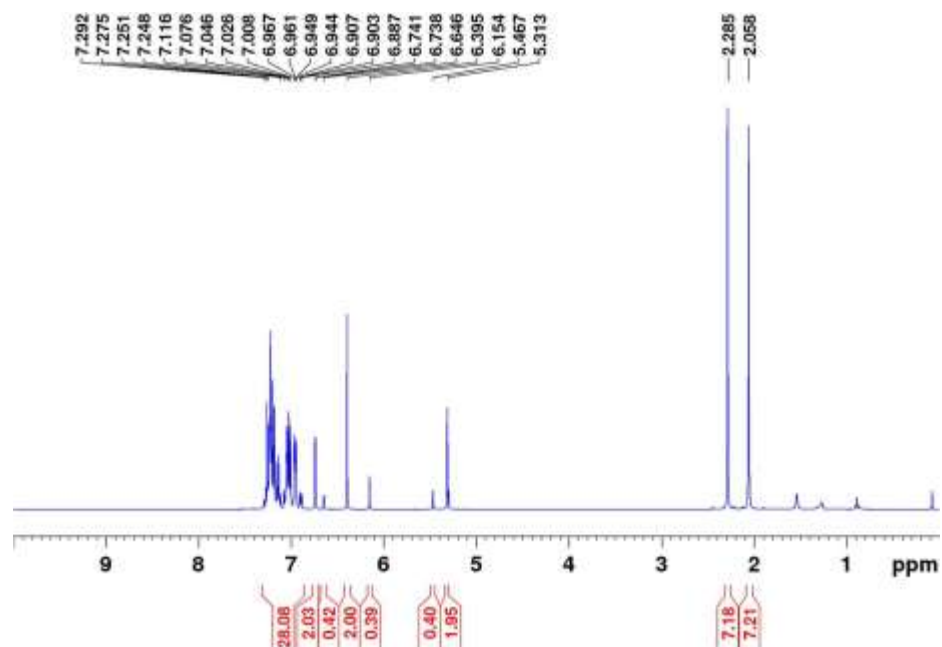

$^{13}\text{C}\{^1\text{H}\}$  NMR ( $\text{CDCl}_3$ )

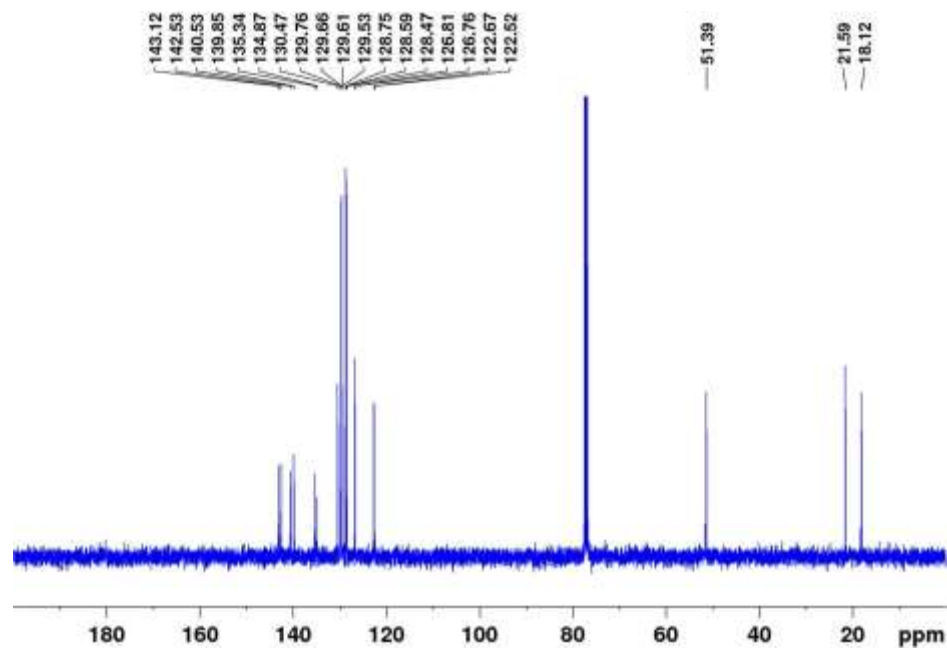

(1,3-bis(2-diphenylmethyl-4,6-dimethylphenyl)-imidazol-2-yl)silver (I) chloride (5)

(D250145)

$^1\text{H}$  NMR ( $\text{CDCl}_3$ )

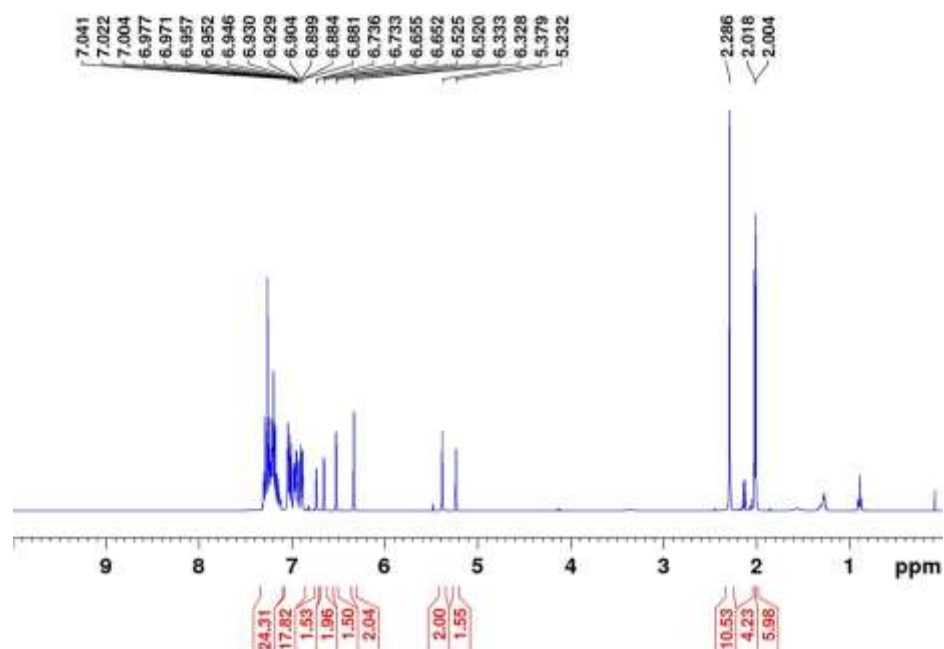

$^{13}\text{C}\{^1\text{H}\}$  NMR ( $\text{CDCl}_3$ )

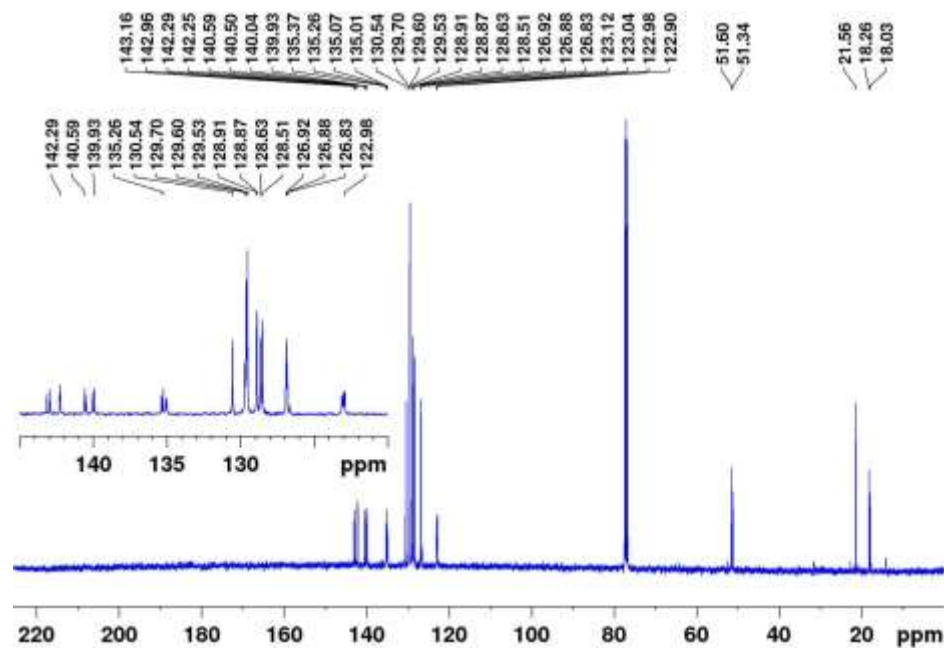

(1,3-bis(2-diphenylmethyl-4,6-dimethylphenyl)-imidazol-2-yl) (η<sup>5</sup>-cyclopentadienyl)nickel(II)

chloride (6)

(D252773)

<sup>1</sup>H NMR (CDCl<sub>3</sub>)

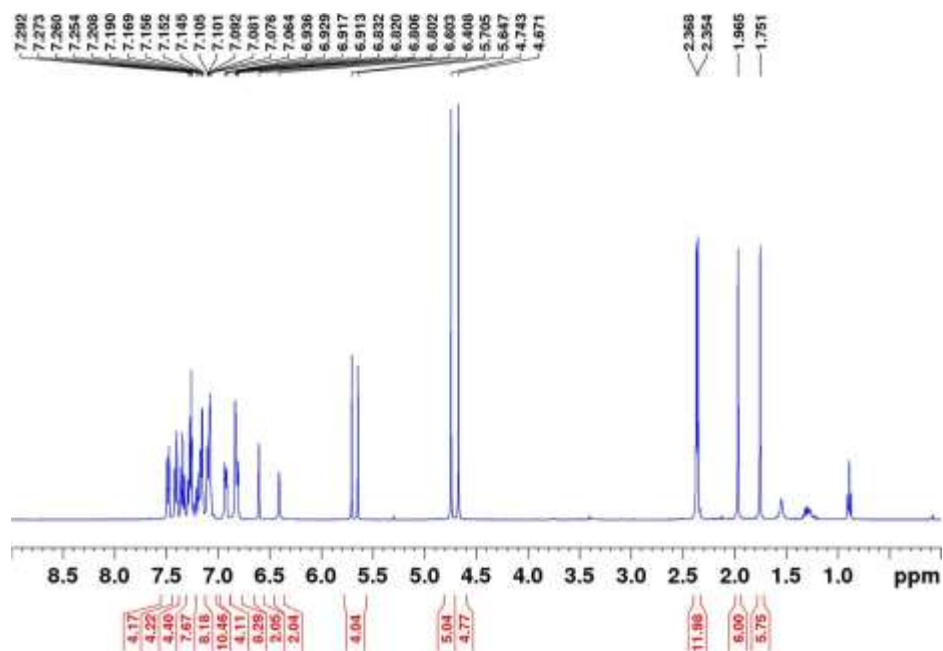

<sup>13</sup>C{<sup>1</sup>H} NMR (CDCl<sub>3</sub>)

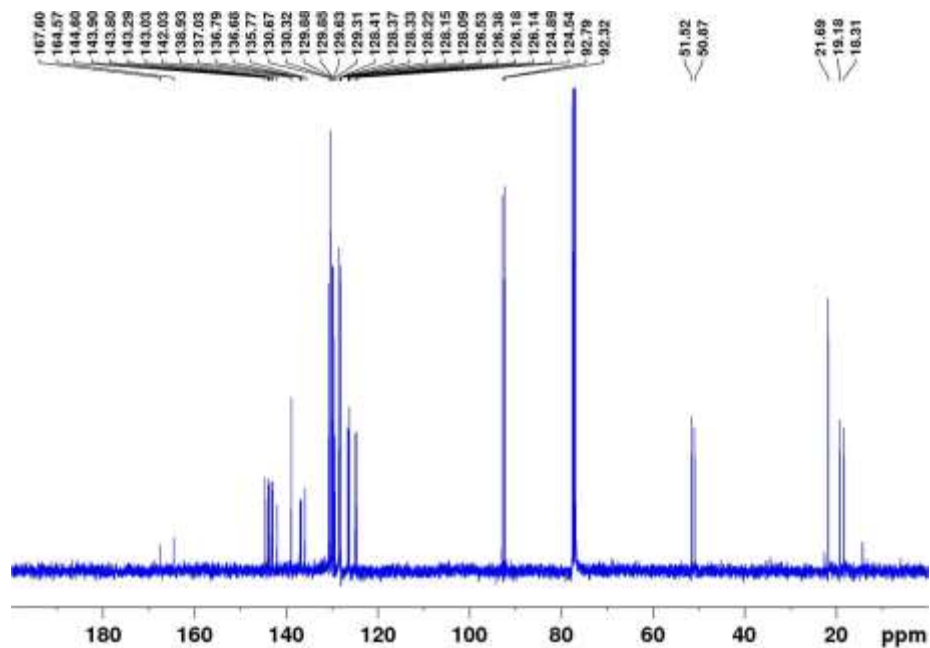

(1,3-bis(2-diphenylmethyl-4,6-dimethylphenyl)-imidazol-2-yl) (η<sup>2</sup>,η<sup>2</sup>-1,5-cyclooctadienyl)iridium(I) chloride (7). (D253696)

<sup>1</sup>H NMR (CDCl<sub>3</sub>)

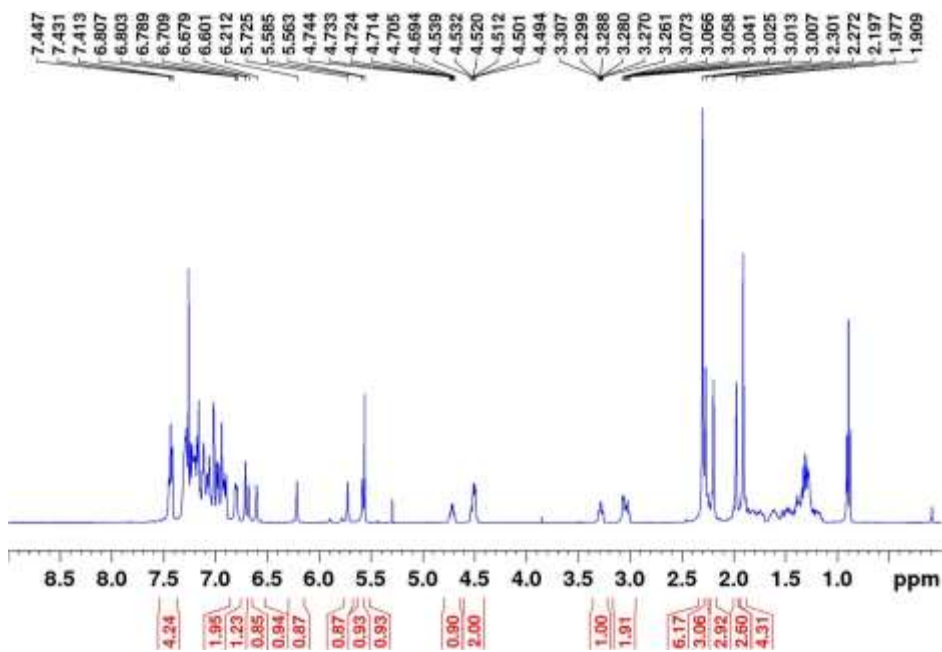

<sup>13</sup>C{<sup>1</sup>H} NMR (CDCl<sub>3</sub>)

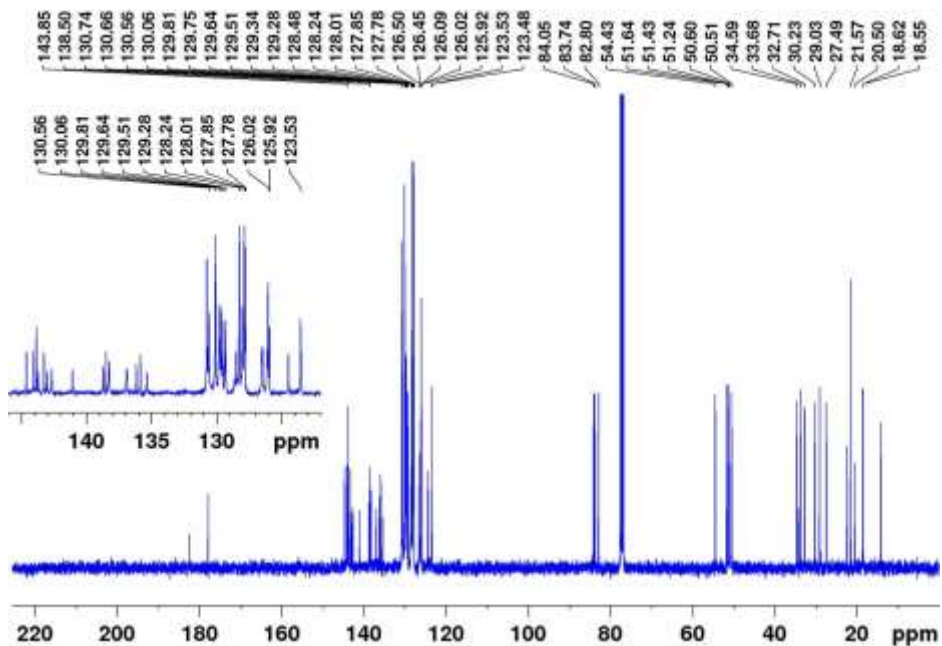



(1,3-bis(2-diphenylmethyl-4,6-dimethylphenyl)-imidazol-2-yl)dicarbonyliridium(II) chloride (8).

$^1\text{H}$  NMR ( $\text{C}_6\text{D}_6$ )

(D254029)

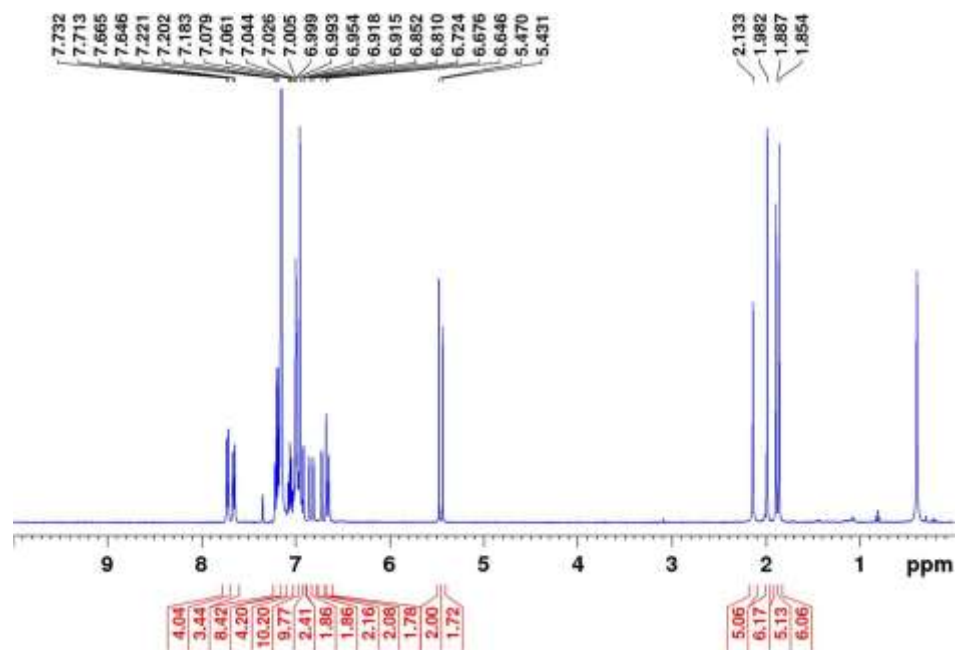

$^1\text{H}$  NMR ( $\text{CDCl}_3$ )

(D254034)

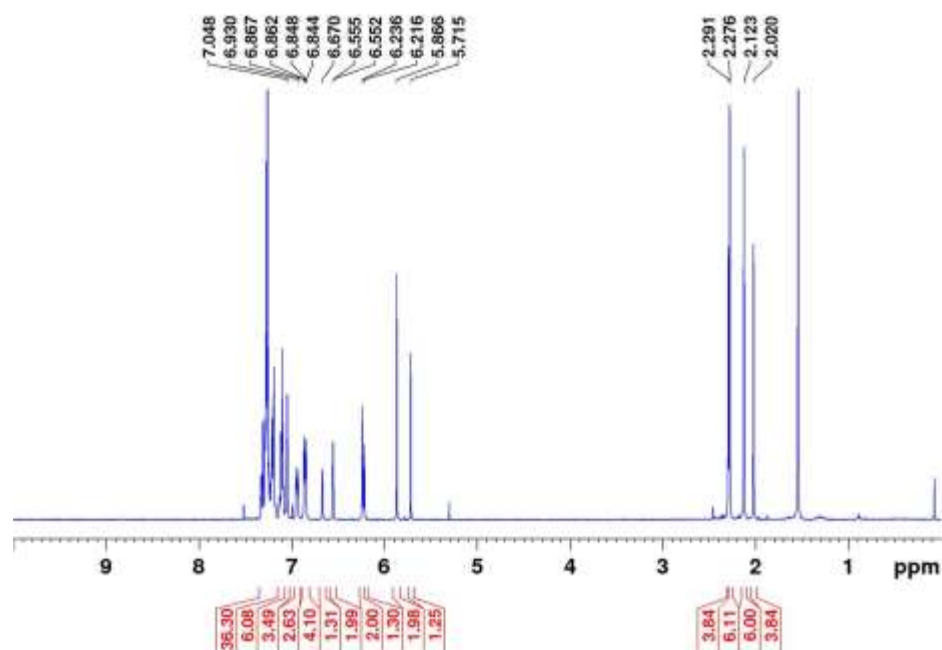

$^{13}\text{C}\{^1\text{H}\}$  NMR ( $\text{CDCl}_3$ )

(D254034)

(see note in experimental section)

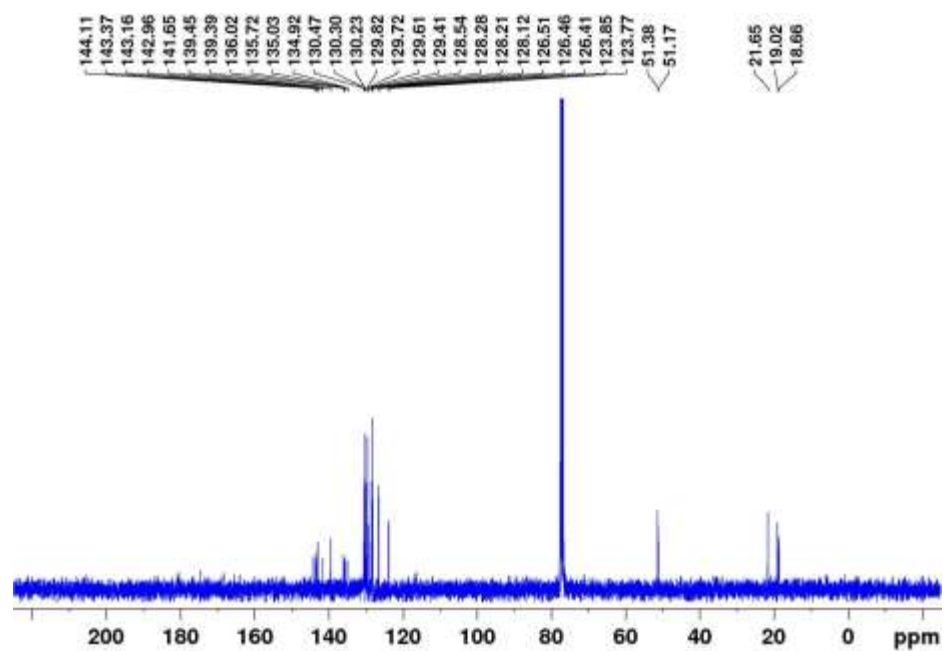

## Mass Spectrometry

Accurate mass data collected by the EPSRC UK National Mass Spectrometry Facility at Swansea.

1,3-bis(2-diphenylmethyl-4,6-dimethylphenyl)-imidazolium chloride (1).

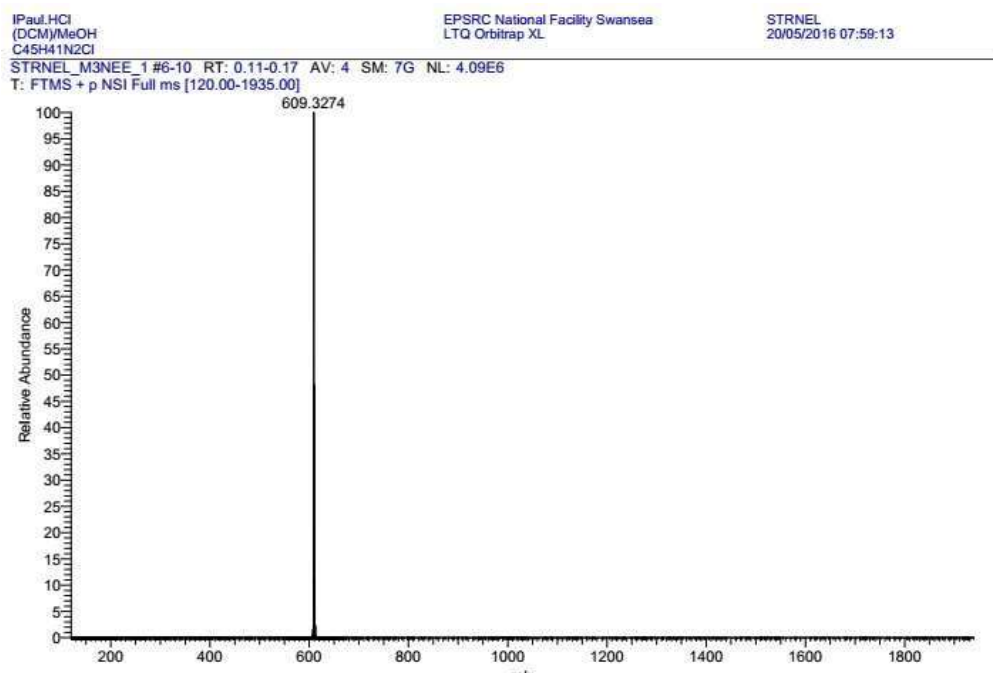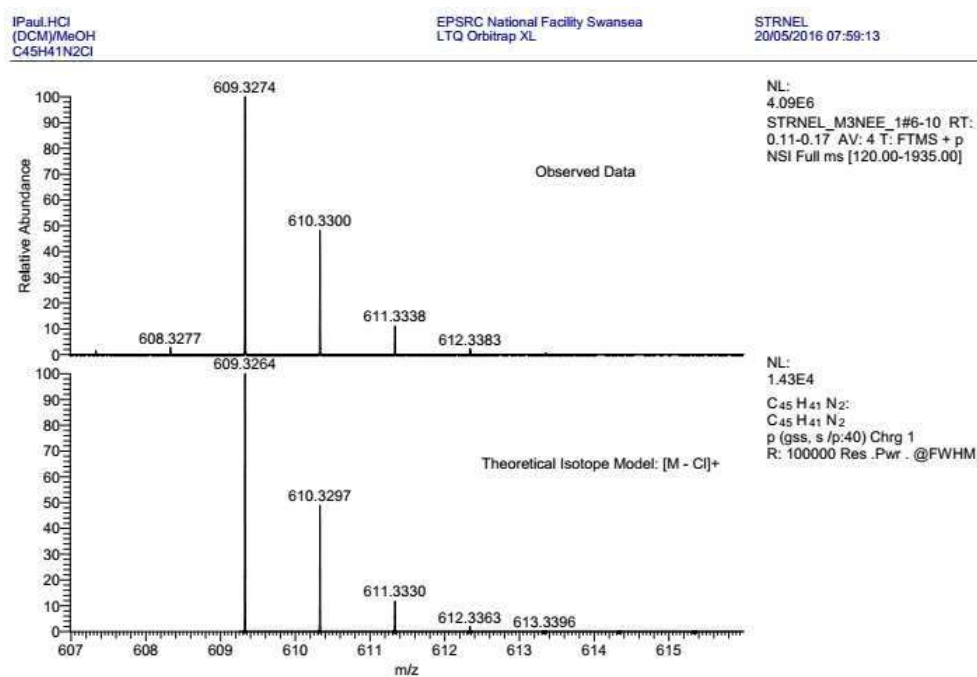

## GC-FID Calibration

Each point represents a separate weighing of both analyte and internal standard.

Benzophenone

( $t_R = 13.40$  min)

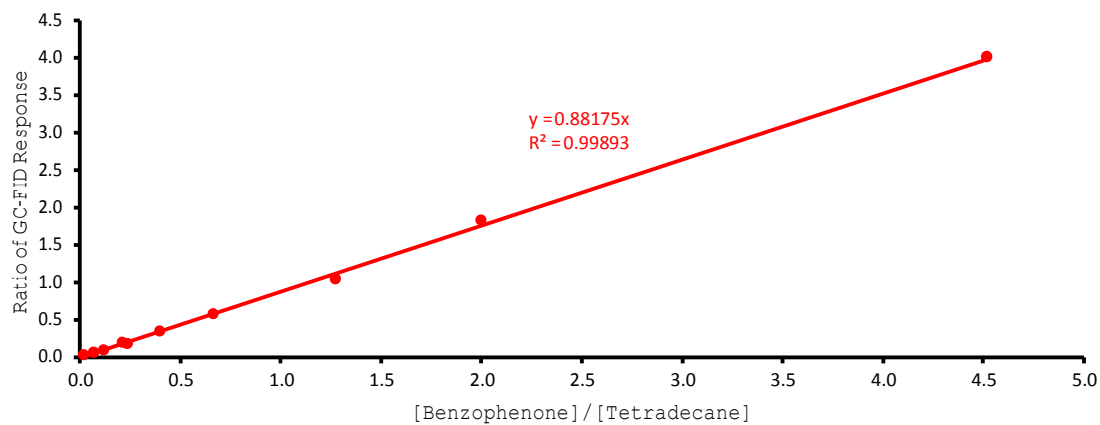

(Benzhydroxyloxy)triethylsilane

( $t_R = 15.04$  min)

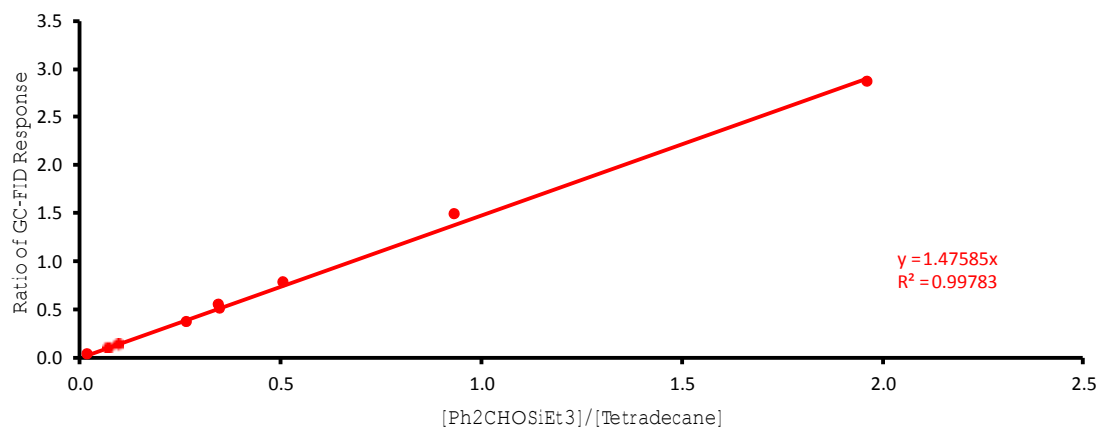

Experimental. Data were measured at low temperature with Oxford Diffraction instrumentation and with monochromated MoK $\alpha$  radiation. All structures were refined to convergence, on  $F^2$  and against all unique reflections with SHELX-97.<sup>1</sup> The structure of [IrCl(cod)(IPaul)] (7) was found to contain disordered solvent molecules. Having failed to model these, the SQUEEZE routine implemented within PLATON was used to remove the solvent from the model.<sup>2</sup> Approximately 38 electron equivalents were removed from 269 Å<sup>3</sup> of unit cell volume. In both the [AgCl(IPaul)] (5) and the [IrCl(cod)(IPaul)] (7) structures, one phenyl ring of the carbene ligand was modelled as disordered over two sites. Suitable restraints on displacement parameters and bond lengths were applied in order to ensure that these disordered groups approximated normal behavior. One of the DCM solvent sites in [NiClCp(IPaul)].2CH<sub>2</sub>Cl<sub>2</sub> (6) was also disordered and was treated in a similar fashion. Selected crystallographic and geometric parameters are given in the Table on the following page.

1. G. Sheldrick, *Acta Crystallogr., Sect. A.*, 2008, 64, 112-122.
2. A. Spek, *Acta Crystallographica Section D*, 2009, 65, 148-155.

| Compound                                  | [CuCl(IPaul)]                                        | [AgCl(IPaul)]                                        | [NiCl(Cp) (IPaul)]                                               | [IrCl(COD) (IPaul)]                                              |
|-------------------------------------------|------------------------------------------------------|------------------------------------------------------|------------------------------------------------------------------|------------------------------------------------------------------|
| <b>M/S Ref.</b>                           | 4                                                    | 5                                                    | 6                                                                | 7                                                                |
| CCDC Ref.                                 | <b>1481901</b>                                       | <b>1481902</b>                                       | <b>1481903</b>                                                   | <b>1481904</b>                                                   |
| Formula                                   | <b>C<sub>45</sub>H<sub>40</sub>ClCuN<sub>2</sub></b> | <b>C<sub>45</sub>H<sub>40</sub>AgClN<sub>2</sub></b> | <b>C<sub>52</sub>H<sub>49</sub>Cl<sub>5</sub>N<sub>2</sub>Ni</b> | <b>C<sub>53</sub>H<sub>52</sub>ClIrN<sub>2</sub><sup>a</sup></b> |
| Formula Weight                            | <b>707.78</b>                                        | <b>752.11</b>                                        | <b>937.89</b>                                                    | <b>944.62</b>                                                    |
| Crystal system                            | <b>Monoclinic</b>                                    | <b>Monoclinic</b>                                    | <b>Monoclinic</b>                                                | <b>Triclinic</b>                                                 |
| Space Group                               | <b>P 2<sub>1</sub>/c</b>                             | <b>P 2<sub>1</sub>/c</b>                             | <b>P 2<sub>1</sub>/n</b>                                         | <b>P -1</b>                                                      |
| $\lambda$ Å                               | <b>0.71073</b>                                       | <b>0.71073</b>                                       | <b>0.71073</b>                                                   | <b>0.71073</b>                                                   |
| a Å                                       | <b>18.1556(9)</b>                                    | <b>18.2111(8)</b>                                    | <b>10.8315(4)</b>                                                | <b>9.6593(3)</b>                                                 |
| b Å                                       | <b>9.0431(4)</b>                                     | <b>9.2144(5)</b>                                     | <b>24.7675(6)</b>                                                | <b>12.5384(5)</b>                                                |
| c Å                                       | <b>22.1244(14)</b>                                   | <b>21.9147(16)</b>                                   | <b>17.4157(5)</b>                                                | <b>21.2099(8)</b>                                                |
| $\alpha$ °                                | <b>90</b>                                            | <b>90</b>                                            | <b>90</b>                                                        | <b>78.174(3)</b>                                                 |
| $\beta$ °                                 | <b>96.965(5)</b>                                     | <b>97.416(5)</b>                                     | <b>102.643(3)</b>                                                | <b>77.515(3)</b>                                                 |
| $\gamma$ °                                | <b>90</b>                                            | <b>90</b>                                            | <b>90</b>                                                        | <b>67.464(3)</b>                                                 |
| Volume Å <sup>3</sup>                     | <b>3605.6(3)</b>                                     | <b>3646.6(4)</b>                                     | <b>4558.8(2)</b>                                                 | <b>2295.19(14)</b>                                               |
| Temp. K                                   | <b>123(2)</b>                                        | <b>123(2)</b>                                        | <b>123(2)</b>                                                    | <b>123(2)</b>                                                    |
| Z                                         | <b>4</b>                                             | <b>4</b>                                             | <b>4</b>                                                         | <b>2</b>                                                         |
| Refls. Collected                          | <b>17499</b>                                         | <b>34193</b>                                         | <b>20995</b>                                                     | <b>12092</b>                                                     |
| 2 $\theta$ max °                          | <b>59.54</b>                                         | <b>56.00</b>                                         | <b>56.00</b>                                                     | <b>54.00</b>                                                     |
| Refls. Unique                             | <b>8884</b>                                          | <b>8669</b>                                          | <b>10611</b>                                                     | <b>9421</b>                                                      |
| Refls. Obs.                               | <b>6420</b>                                          | <b>6739</b>                                          | <b>7115</b>                                                      | <b>8263</b>                                                      |
| R <sub>int</sub>                          | <b>0.0373</b>                                        | <b>0.0665</b>                                        | <b>0.0526</b>                                                    | <b>0.0276</b>                                                    |
| Goodness of Fit                           | <b>1.040</b>                                         | <b>1.067</b>                                         | <b>1.038</b>                                                     | <b>1.047</b>                                                     |
| R[I>2s(I)],F                              | <b>0.0519</b>                                        | <b>0.0581</b>                                        | <b>0.0652</b>                                                    | <b>0.0352</b>                                                    |
| R <sub>w</sub> , F <sup>2</sup>           | <b>0.1078</b>                                        | <b>0.1498</b>                                        | <b>0.1854</b>                                                    | <b>0.0864</b>                                                    |
| Max/min electron density eÅ <sup>-3</sup> | <b>0.464/-0.533</b>                                  | <b>1.436/-1.869</b>                                  | <b>1.058/-0.591</b>                                              | <b>1.161/-1.014</b>                                              |

<sup>a</sup> Formula does not include disordered solvent removed by PLATON SQUEEZE.

[CuCl(IPaul)] (4)

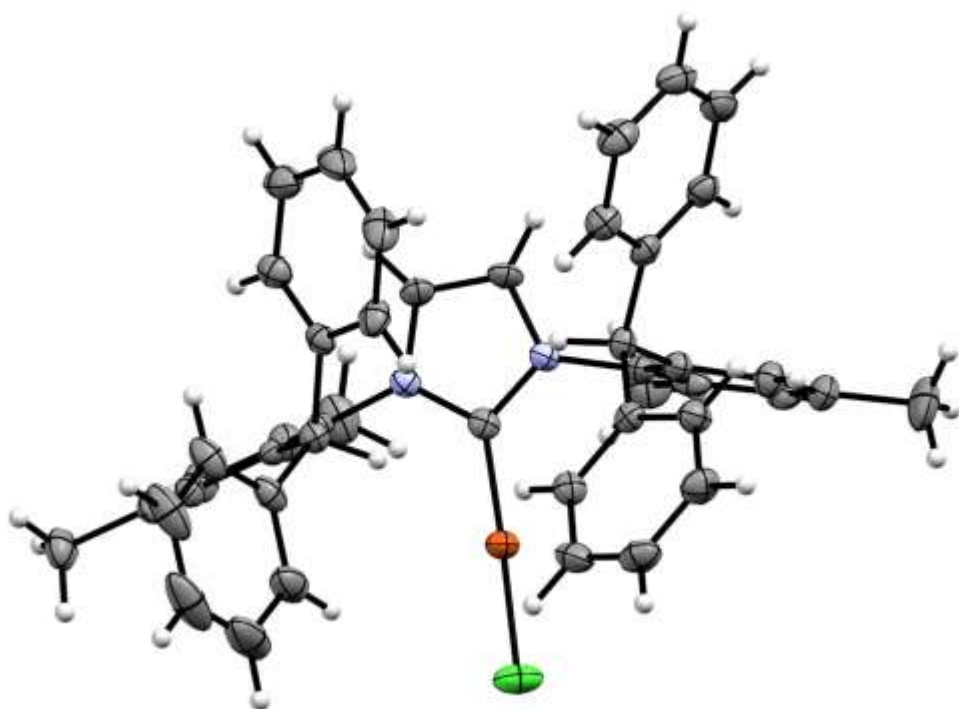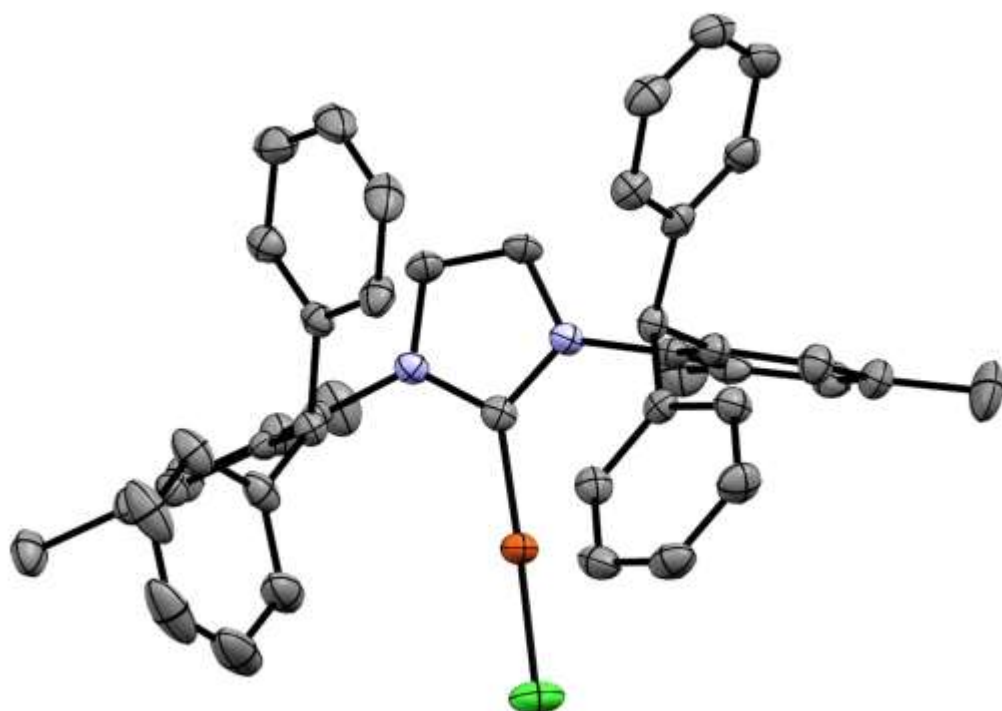

[AgCl(IPaul)] (5)

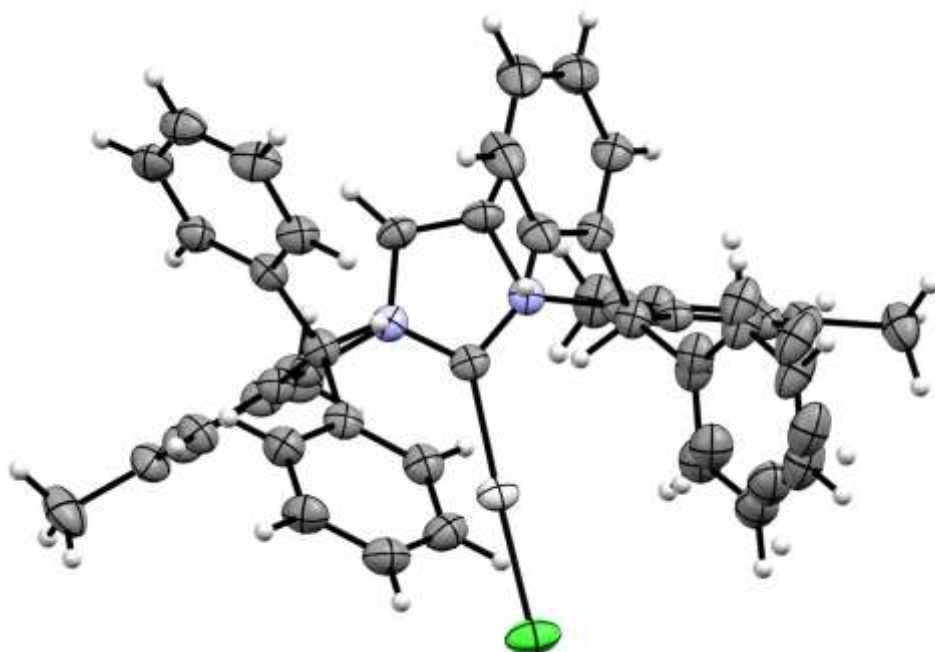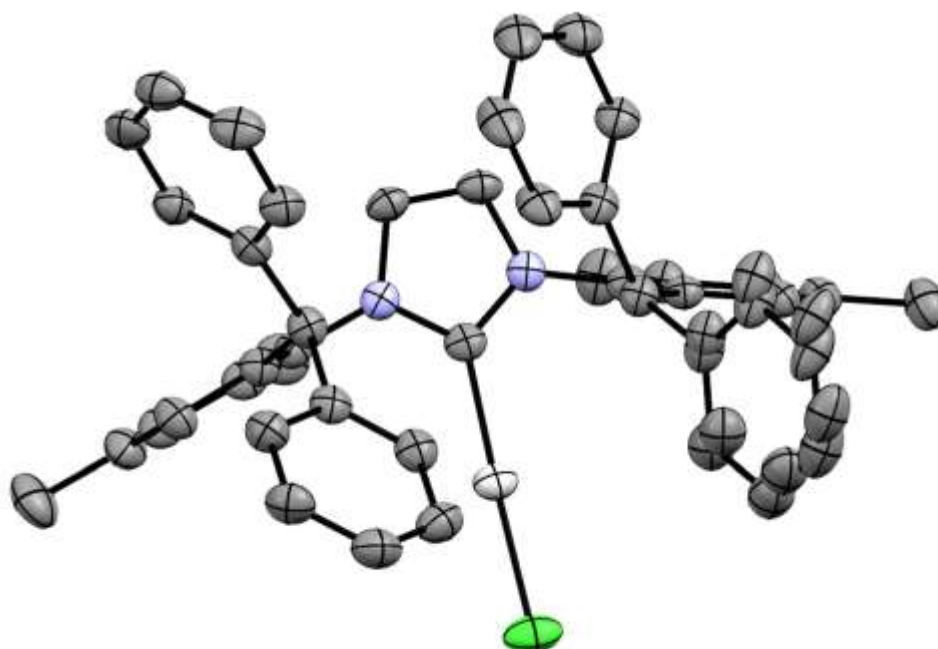



[NiCl(Cp)(IPaul)] (6)

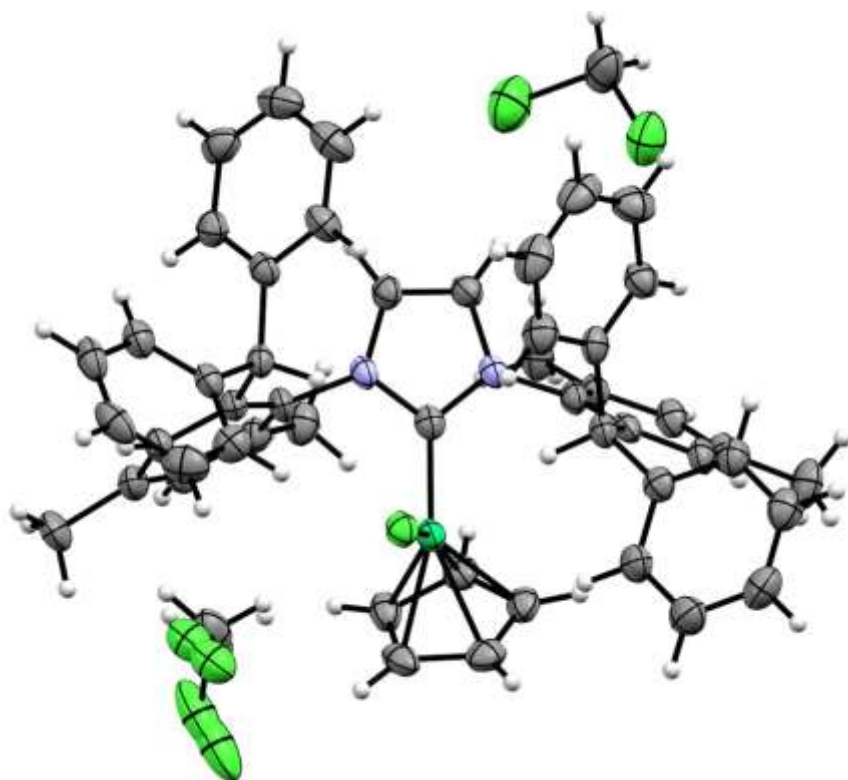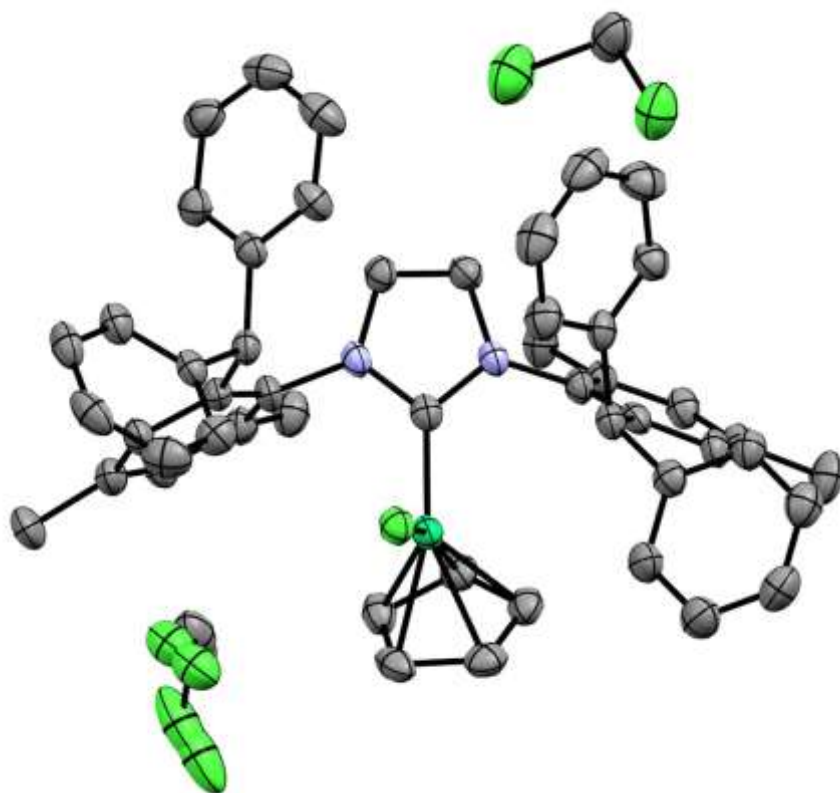

[IrCl(COD)(IPaul)] (7)

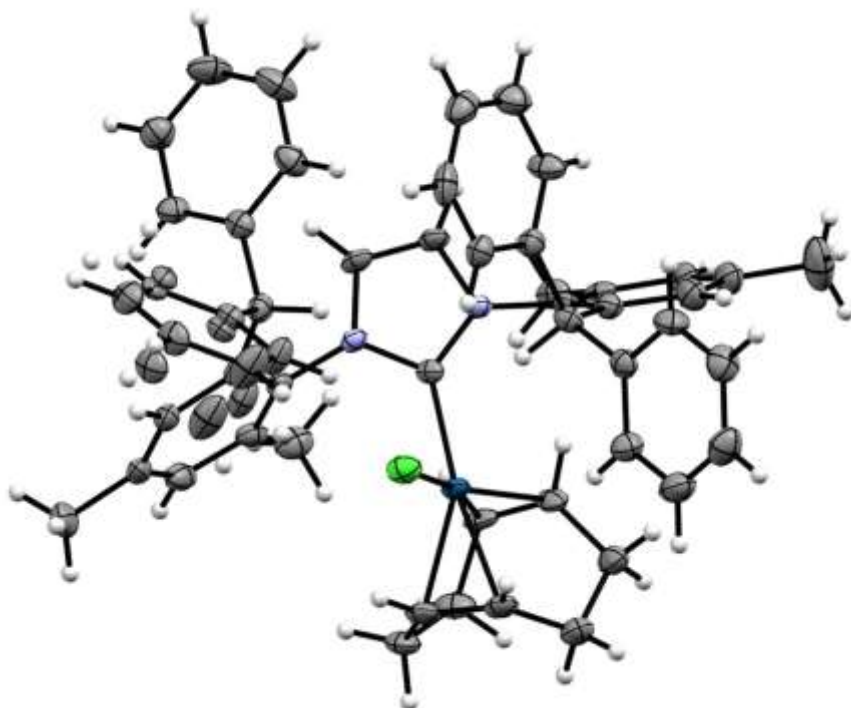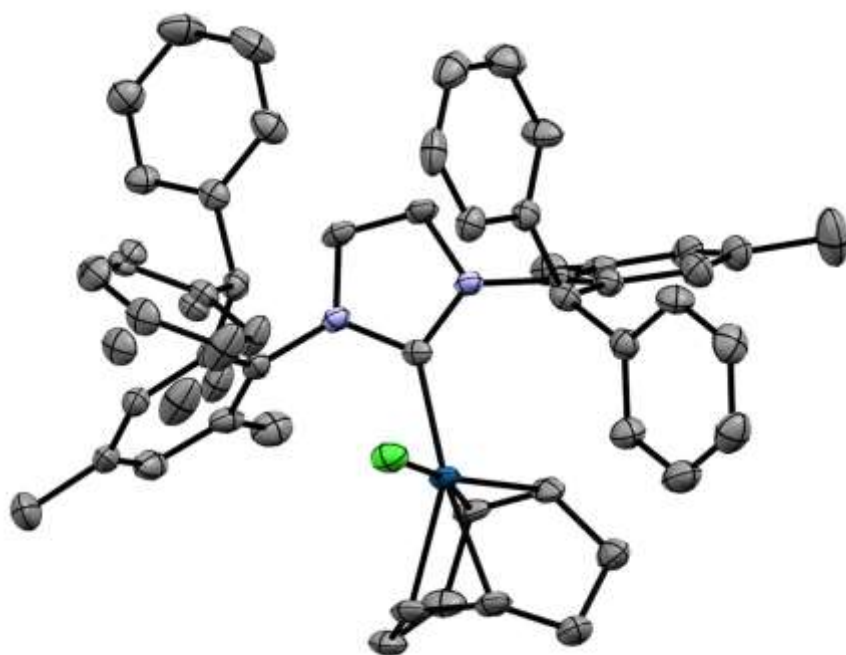

Supplement: c6dt02100j1.pdf [file c6dt02100j1.pdf]
